# Supplementary material for: Comparison of Six Automated Immunoassays With Isotope-Diluted Liquid Chromatography-Tandem Mass Spectrometry for Total Thyroxine Measurement
Source: PubMed Central journal article supplement — Ann Lab Med. 2019 Feb 26;39(4):381–7. doi: 10.3343/alm.2019.39.4.381 (PMC6400722; doi:10.3343/alm.2019.39.4.381), 2019-02-26
Supplement: alm-39-381-s001.pdf [file alm-39-381-s001.pdf]

**Supplemental Data Table S1.** Immunoassays used in this study

| Manufacturer    | Principle | Instruction for use approval or modification date | Measurement range (nmol/L) | Limit of detection (nmol/L) | Cross reactivity with T3 (%) | Cross reactivity with rT3 (%) | Reference range (nmol/L) | Manufacturer declared precision (%) | Calibrator lot | Reagent lot |
|-----------------|-----------|---------------------------------------------------|----------------------------|-----------------------------|------------------------------|-------------------------------|--------------------------|-------------------------------------|----------------|-------------|
| Abbott          | CMIA      | 2014/12/22                                        | 12.9–309.6                 | NA                          | <3.2                         | NA                            | 62.82–151.19             | ≤7.3                                | 7K66-01        | 55935UI00   |
| Autobio         | CMIA      | 2014/6/18                                         | 6.45–30.00                 | NA                          | <2.3                         | <2.3                          | 58.05–154.8              | ≤15                                 | 2015101503     | 20151121    |
| Beckman-Coulter | CLIA      | 2012/9/29                                         | 6.45–387                   | 6.45                        | 1.24                         | 19.95                         | 78.56–157.77             | ≤10                                 | 33805          | 527911      |
| Mindray         | CMIA      | 2013/4/12                                         | 6.45–387                   | ≤6.45                       | 0.94                         | 6.07                          | 64.5–146.93              | ≤10                                 | 20150901       | 150701      |
| Roche           | ECLIA     | 2014/9/25                                         | 5.42–320.69                | 5.42                        | <1.53                        | NA                            | 65.79–181.89             | ≤6.9                                | 18150202       | 188364      |
| Siemens         | CLIA      | 2015/1/26                                         | 3.87–387                   | 3.87                        | 1.20                         | 2.70                          | 58.05–140.61             | ≤5.5                                | 53803A86       | 4003169     |

Abbreviations: T3, 3,3',5-triiodo-L-thyronine; rT3, reverse T3; CMIA, chemiluminescence microparticle immunoassay; CLIA, chemiluminescence immunoassay; ECLIA, electrochemiluminescence immunoassay.
